# Supplementary material
Source: PubMed Central journal article supplement (PMC4014845)
Supplement: supp_blood-2013-06-507582_Document1.pdf [file supp_blood-2013-06-507582_Document1.pdf]

## Supplementary Data

### Neutrophil migration in Dunn Chamber Assay

To better understand the nature of the migratory defect, we performed real time imaging using a Dunn chamber, which allows direct visualization of neutrophil motility and directional migration along a chemokine gradient. Overall, a significantly lower percentage of *Srf* KO than WT neutrophils migrated towards the fMLP gradient (Suppl. Figure 3A; WT  $53.44 \pm 3.12\%$  vs. KO  $18.83 \pm 5.11\%$ ;  $p = 0.029$ ). In addition, *Srf* WT neutrophils migrated rapidly towards the fMLP gradient, while those *Srf* KO neutrophils that migrated (with cut-off of minimum distance of  $7.5\mu\text{m}$ ) achieved a significantly lower translocation distance (Suppl. Figure 3B; WT  $54.29 \pm 0.40 \mu\text{m}/30\text{min}$  vs. KO  $27.68 \pm 0.19 \mu\text{m}/30\text{min}$ ;  $p=0.0003$ ). Movies show WT (Video 1) and KO (Video 2) neutrophil migration. Thus *Srf* KO neutrophils have a severe migration defect *in vitro*, which is likely responsible for the lack of neutrophil accumulation at sites of inflammation *in vivo*.

### Cell adhesion is defective in *Srf* KO neutrophils

Integrins LFA1 and Mac1 play distinct roles in neutrophil adhesion. While LFA1 predominantly functions in the initial engagement of the neutrophil with the endothelium leading to rolling followed by arrest, binding of endothelial ICAM-1 to Mac-1 induces neutrophil crawling on the endothelial surface and transmigration through endothelial pores. We tested neutrophil adhesion in response to fMLP. Equal numbers of *Srf* WT and KO neutrophils were allowed to adhere to uncoated or fibrinogen-coated glass coverslips with or without stimulation with fMLP. Non-adherent neutrophils were removed by gentle rinsing. Significantly fewer *Srf* KO neutrophils adhered to uncoated or fibrinogen coated coverslips following stimulation with fMLP. Shown in Supplemental Figure 4.

## Supplementary Methods

### Dunn chamber assay

Equal numbers of WT and KO neutrophils were allowed to adhere to fibrinogen-coated coverslips, which were inverted onto a Dunn Chamber (Hawksley, Lancing, Sussex). Migration towards an fMLP gradient across the Dunn chamber bridge was imaged every 30 seconds over a period of 30 minutes. Images were analyzed using MetaMorph and Microsoft Excel Software as previously described.<sup>1</sup>

### Adhesion Assay

For cellular adhesion isolated neutrophils were stimulated with vehicle or fMLP and allowed to adhere to uncoated or fibrinogen-coated coverslips. Non-adherent cells were gently washed off. Adherent cells were counted on 5 20x fields and averaged. The experiment was repeated 3 times.

**Figure S1:** (A) Neutrophil morphology from *Srf* WT and KO mice. (B) White cell count (WBC) and white cell differential in primary Dox-inducible Cre *Srf* WT  $n=11$  and

KO n=10 mice. Peripheral blood from Dox-inducible Cre/*Srf* bone marrow transplanted mice aged 4 weeks was obtained after treatment with doxycycline for 8-10 days and WBC and WBC differential assessed on a Hemavet. *Srf* expression in Neutrophils from dox-inducible *Srf* WT and KO mice assessed by qRT-PCR (C) and Western blot (D).

**Figure S2:** Lung immunohistology of recipients of Dox-inducible *Srf* WT and KO bone marrow probed for the neutrophil specific antibody 7/4 prior to (0hr) and 4 (4hr) and 24 hours (24hr) after LPS nebulization (60x magnification; Size bar=20 $\mu$ m).

**Figure S3:** CXCR2 expression and migration of *Srf* WT and KO neutrophils in Dunn chamber assay. (A) CXCR2 expression was assessed by flow-cytometry on *Srf* WT and KO neutrophils. (B,C) *Srf* WT and KO neutrophils were directly imaged while exposed to fMLP gradient in a Dunn chamber. (B) The percentage of migrating neutrophils was assessed with a cut-off of 7.5 $\mu$ m, which corresponds to one-half the diameter of an activated neutrophil. (C) The translocation distance in  $\mu$ m was measured for those neutrophils, that migrated at least 7.5 $\mu$ m (\* $p$ <.05; \*\*\* $p$ <.0005).

**Figure S4:** Integrin Expression and Adhesion. Gene expression was assessed in *Srf* WT and KO neutrophils by qRT-PCR (A). CD11b and CD11a expression was assessed by flow-cytometry in *Srf* WT and KO neutrophils 0, 2, and 5 minutes after fMLP stimulation (B). *Srf* WT and KO neutrophils were allowed to adhere to untreated or fibrinogen coated glass coverslips in the absence or presence of activation with fMLP (C). Representative of 3 independent experiments, number of fields counted per slide (n)=5. (\*\* $p$ <.0005, \* $p$ <.05)

**Figure S5:** Immunofluorescence quantification. Quantification of cells from Figure 6. (A) Percent of cells with polarized CD11b; n = number of cells: WT 0 min. n=28, WT 15 min. n=32, KO 0 min. n=12, KO 15 min. n=12 cells. (B) Percent of cells with polarized clathrin; WT 0 min. n=25, WT 15 min. n=45, KO 0 min. n=24, KO 15 min. n=30 cells. (C) Percent of cells with polarized kindlin; WT 0 min. n=82, WT 15 min. n=151, KO 0 min. n=64, KO 15 min. n=93 cells.

Video 1 (WT) and Video 2 (KO) neutrophil migration in Dunn chamber assay.

1. Zhang Y, Tang W, Jones MC, Xu W, Halene S, Wu D. Different roles of G protein subunits beta1 and beta2 in neutrophil function revealed by gene expression silencing in primary mouse neutrophils. *J Biol Chem.* 2010;285(32):24805-24814.

Table S1 Actin Cytoskeletal Genes down-regulated

| <b>GENE</b>    | <b>LOCUS</b>              | <b>KO_FPKM</b> | <b>WT_FPKM</b> | <b>Fold Change<br/>WT vs KO</b> | <b>p_value</b> |
|----------------|---------------------------|----------------|----------------|---------------------------------|----------------|
| <b>Hunk</b>    | chr16:90386396-90499553   | 0.0243873      | 2.68032        | 109.91                          | 0              |
| <b>Srf</b>     | chr17:46546838-46556162   | 0.43898        | 13.7479        | 31.32                           | 0              |
| <b>Lhx1</b>    | chr11:84519378-84525534   | 0.13868        | 3.77373        | 27.21                           | 0              |
| <b>Acta1</b>   | chr8:123891766-123894736  | 3.48133        | 47.4917        | 13.64                           | 0              |
| <b>Lima1</b>   | chr15:99778467-99875456   | 0.78814        | 8.92323        | 11.32                           | 0              |
| <b>Actg1</b>   | chr11:120345689-120348484 | 261.927        | 2246           | 8.57                            | 0              |
| <b>Myh11</b>   | chr16:14194526-14291408   | 0.0590963      | 0.496764       | 8.41                            | 6.14E-13       |
| <b>Fscn2</b>   | chr11:120361533-120368173 | 0.0447551      | 0.308896       | 6.90                            | 0.00101364     |
| <b>Clip2</b>   | chr5:134489385-134552434  | 0.914883       | 5.98154        | 6.54                            | 0              |
| <b>Tpm4</b>    | chr8:72135291-72153129    | 42.5116        | 223.3          | 5.25                            | 0              |
| <b>Cnn2</b>    | chr10:79697304-80369637   | 113.203        | 586.467        | 5.18                            | 0.00118772     |
| <b>Lyst</b>    | chr13:13590408-13777440   | 13.2339        | 67.3001        | 5.09                            | 0              |
| <b>Fgd3</b>    | chr13:49263109-49309208   | 19.3645        | 81.0618        | 4.19                            | 0              |
| <b>Zyx</b>     | chr6:42349827-42358395    | 85.9583        | 353.862        | 4.12                            | 0              |
| <b>Wdr1</b>    | chr5:38526812-38561595    | 62.3782        | 244.644        | 3.92                            | 0              |
| <b>Numb</b>    | chr12:83795438-83842343   | 14.4483        | 54.489         | 3.77                            | 0              |
| <b>Actb</b>    | chr5:142903115-142906724  | 1268.47        | 4666.63        | 3.68                            | 2.22E-16       |
| <b>Myh9</b>    | chr15:77760588-77842115   | 106.398        | 368.155        | 3.46                            | 0              |
| <b>Acta2</b>   | chr19:34241090-34255336   | 12.8751        | 43.505         | 3.38                            | 0              |
| <b>Diap1</b>   | chr18:37844824-37935411   | 34.2191        | 113.32         | 3.31                            | 0              |
| <b>Myh10</b>   | chr11:68691914-68816624   | 0.46816        | 1.48505        | 3.17                            | 4.01E-10       |
| <b>Egr1</b>    | chr18:34861206-34864956   | 3.77816        | 11.7991        | 3.12                            | 4.91E-14       |
| <b>Coro1a</b>  | chr7:126699773-126704754  | 479.265        | 1231.28        | 2.57                            | 2.88E-12       |
| <b>Wasf2</b>   | chr4:133130632-133198330  | 17.2757        | 43.5538        | 2.52                            | 7.83E-13       |
| <b>Flna</b>    | chrX:74223460-74246534    | 161.403        | 403.3          | 2.50                            | 2.79E-10       |
| <b>Ssh2</b>    | chr11:77216424-77460219   | 18.5403        | 46.313         | 2.50                            | 3.86E-13       |
| <b>Tln1</b>    | chr4:43531512-43562583    | 64.2728        | 149.742        | 2.33                            | 1.93E-10       |
| <b>Pik3cd</b>  | chr4:149649167-149701629  | 37.7274        | 87.668         | 2.32                            | 5.23E-09       |
| <b>Pip5k1a</b> | chr3:95059595-95106858    | 4.85599        | 10.7838        | 2.22                            | 1.93E-07       |

Table S2: Inflammation Genes down-regulated

| <b>GENE</b>   | <b>LOCUS</b>             | <b>KO_FPKM</b> | <b>WT_FPKM</b> | <b>Fold Change<br/>WT vs KO</b> | <b>p_value</b> |
|---------------|--------------------------|----------------|----------------|---------------------------------|----------------|
| <b>Ctse</b>   | chr1:131638313-131675507 | 13.8066        | 199.429        | 14.44                           | 0              |
| <b>Nlrp3</b>  | chr11:59542685-59566956  | 7.09473        | 40.9297        | 5.77                            | 0              |
| <b>Tlr8</b>   | chrX:167242731-167263788 | 4.1957         | 22.1173        | 5.27                            | 0              |
| <b>Lyst</b>   | chr13:13590408-13777440  | 13.2339        | 67.3001        | 5.09                            | 0              |
| <b>Cxcr1</b>  | chr1:74191785-74194631   | 1.02741        | 4.93035        | 4.80                            | 3.45E-13       |
| <b>Il1b</b>   | chr2:129364579-129375733 | 54.5063        | 257.206        | 4.72                            | 0              |
| <b>Nlrp12</b> | chr7:3221509-3249740     | 10.5163        | 43.4205        | 4.13                            | 0              |
| <b>Ccl6</b>   | chr11:83582060-83623693  | 260.361        | 990.904        | 3.81                            | 0              |
| <b>Tlr5</b>   | chr1:182954787-182976044 | 4.26425        | 15.362         | 3.60                            | 0              |
| <b>Il6ra</b>  | chr3:89869323-89913162   | 16.0212        | 50.4615        | 3.15                            | 0              |
| <b>Cxcr2</b>  | chr1:74153993-74161246   | 200.837        | 596.357        | 2.97                            | 4.44E-16       |
| <b>Tlr13</b>  | chrX:106143274-106160493 | 31.9984        | 94.2462        | 2.95                            | 0              |
| <b>Ccr1</b>   | chr9:123962125-123968692 | 72.049         | 211.234        | 2.93                            | 0              |
| <b>Tlr6</b>   | chr5:64953094-64960034   | 4.8346         | 13.8943        | 2.87                            | 2.27E-12       |
| <b>Csf3r</b>  | chr4:126024658-126044975 | 247.76         | 686.976        | 2.77                            | 4.50E-11       |



Table S3: Integrin expression

| <b>GENE</b>   | <b>LOCUS</b>              | <b>KO_FPKM</b> | <b>WT_FPKM</b> | <b>Fold Change<br/>WT vs KO</b> | <b>p_value</b> |
|---------------|---------------------------|----------------|----------------|---------------------------------|----------------|
| <b>Itga8</b>  | chr2:12106659-12312315    | 0.443401       | 1.31623        | 2.97                            | 3.61E-08       |
| <b>Itgal</b>  | chr7:127296259-127335137  | 60.3137        | 149.629        | 2.48                            | 1.10E-10       |
| <b>Itgam</b>  | chr7:128062639-128118491  | 417.826        | 694.321        | 1.66                            | 0.00484506     |
| <b>Itgb7</b>  | chr15:102215994-102231935 | 26.4388        | 35.9967        | 1.36                            | 0.0181999      |
| <b>Itga4</b>  | chr2:79255425-79428988    | 13.8089        | 16.9807        | 1.23                            | 0.105993       |
| <b>Itga5</b>  | chr15:103344285-103366748 | 3.45827        | 3.49268        | 1.01                            | 0.949019       |
| <b>Itgb3</b>  | chr11:104607999-104670471 | 16.0616        | 16.0745        | 1.00                            | 0.99505        |
| <b>Itgb1</b>  | chr8:128685653-128733579  | 23.7798        | 21.9456        | 0.92                            | 0.531771       |
| <b>Itgb2l</b> | chr16:96422297-96443614   | 366.189        | 273.483        | 0.75                            | 0.0303399      |
| <b>Itgb2</b>  | chr10:77530347-77565674   | 554.921        | 979.876        | 0.62                            | 7.77E-05       |
| <b>Itgad</b>  | chr7:128173945-128206366  | 1.90972        | 1.03751        | 0.54                            | 0.00195022     |
| <b>Itga9</b>  | chr9:118606708-118901003  | 0.495038       | 0.222523       | 0.45                            | 0.00909608     |
| <b>Itga2</b>  | chr13:114835911-114932041 | 0.24647        | 0.0917129      | 0.37                            | 0.00247215     |
| <b>Itga2b</b> | chr11:102453296-102469883 | 3.0518         | 1.11977        | 0.37                            | 3.99E-08       |

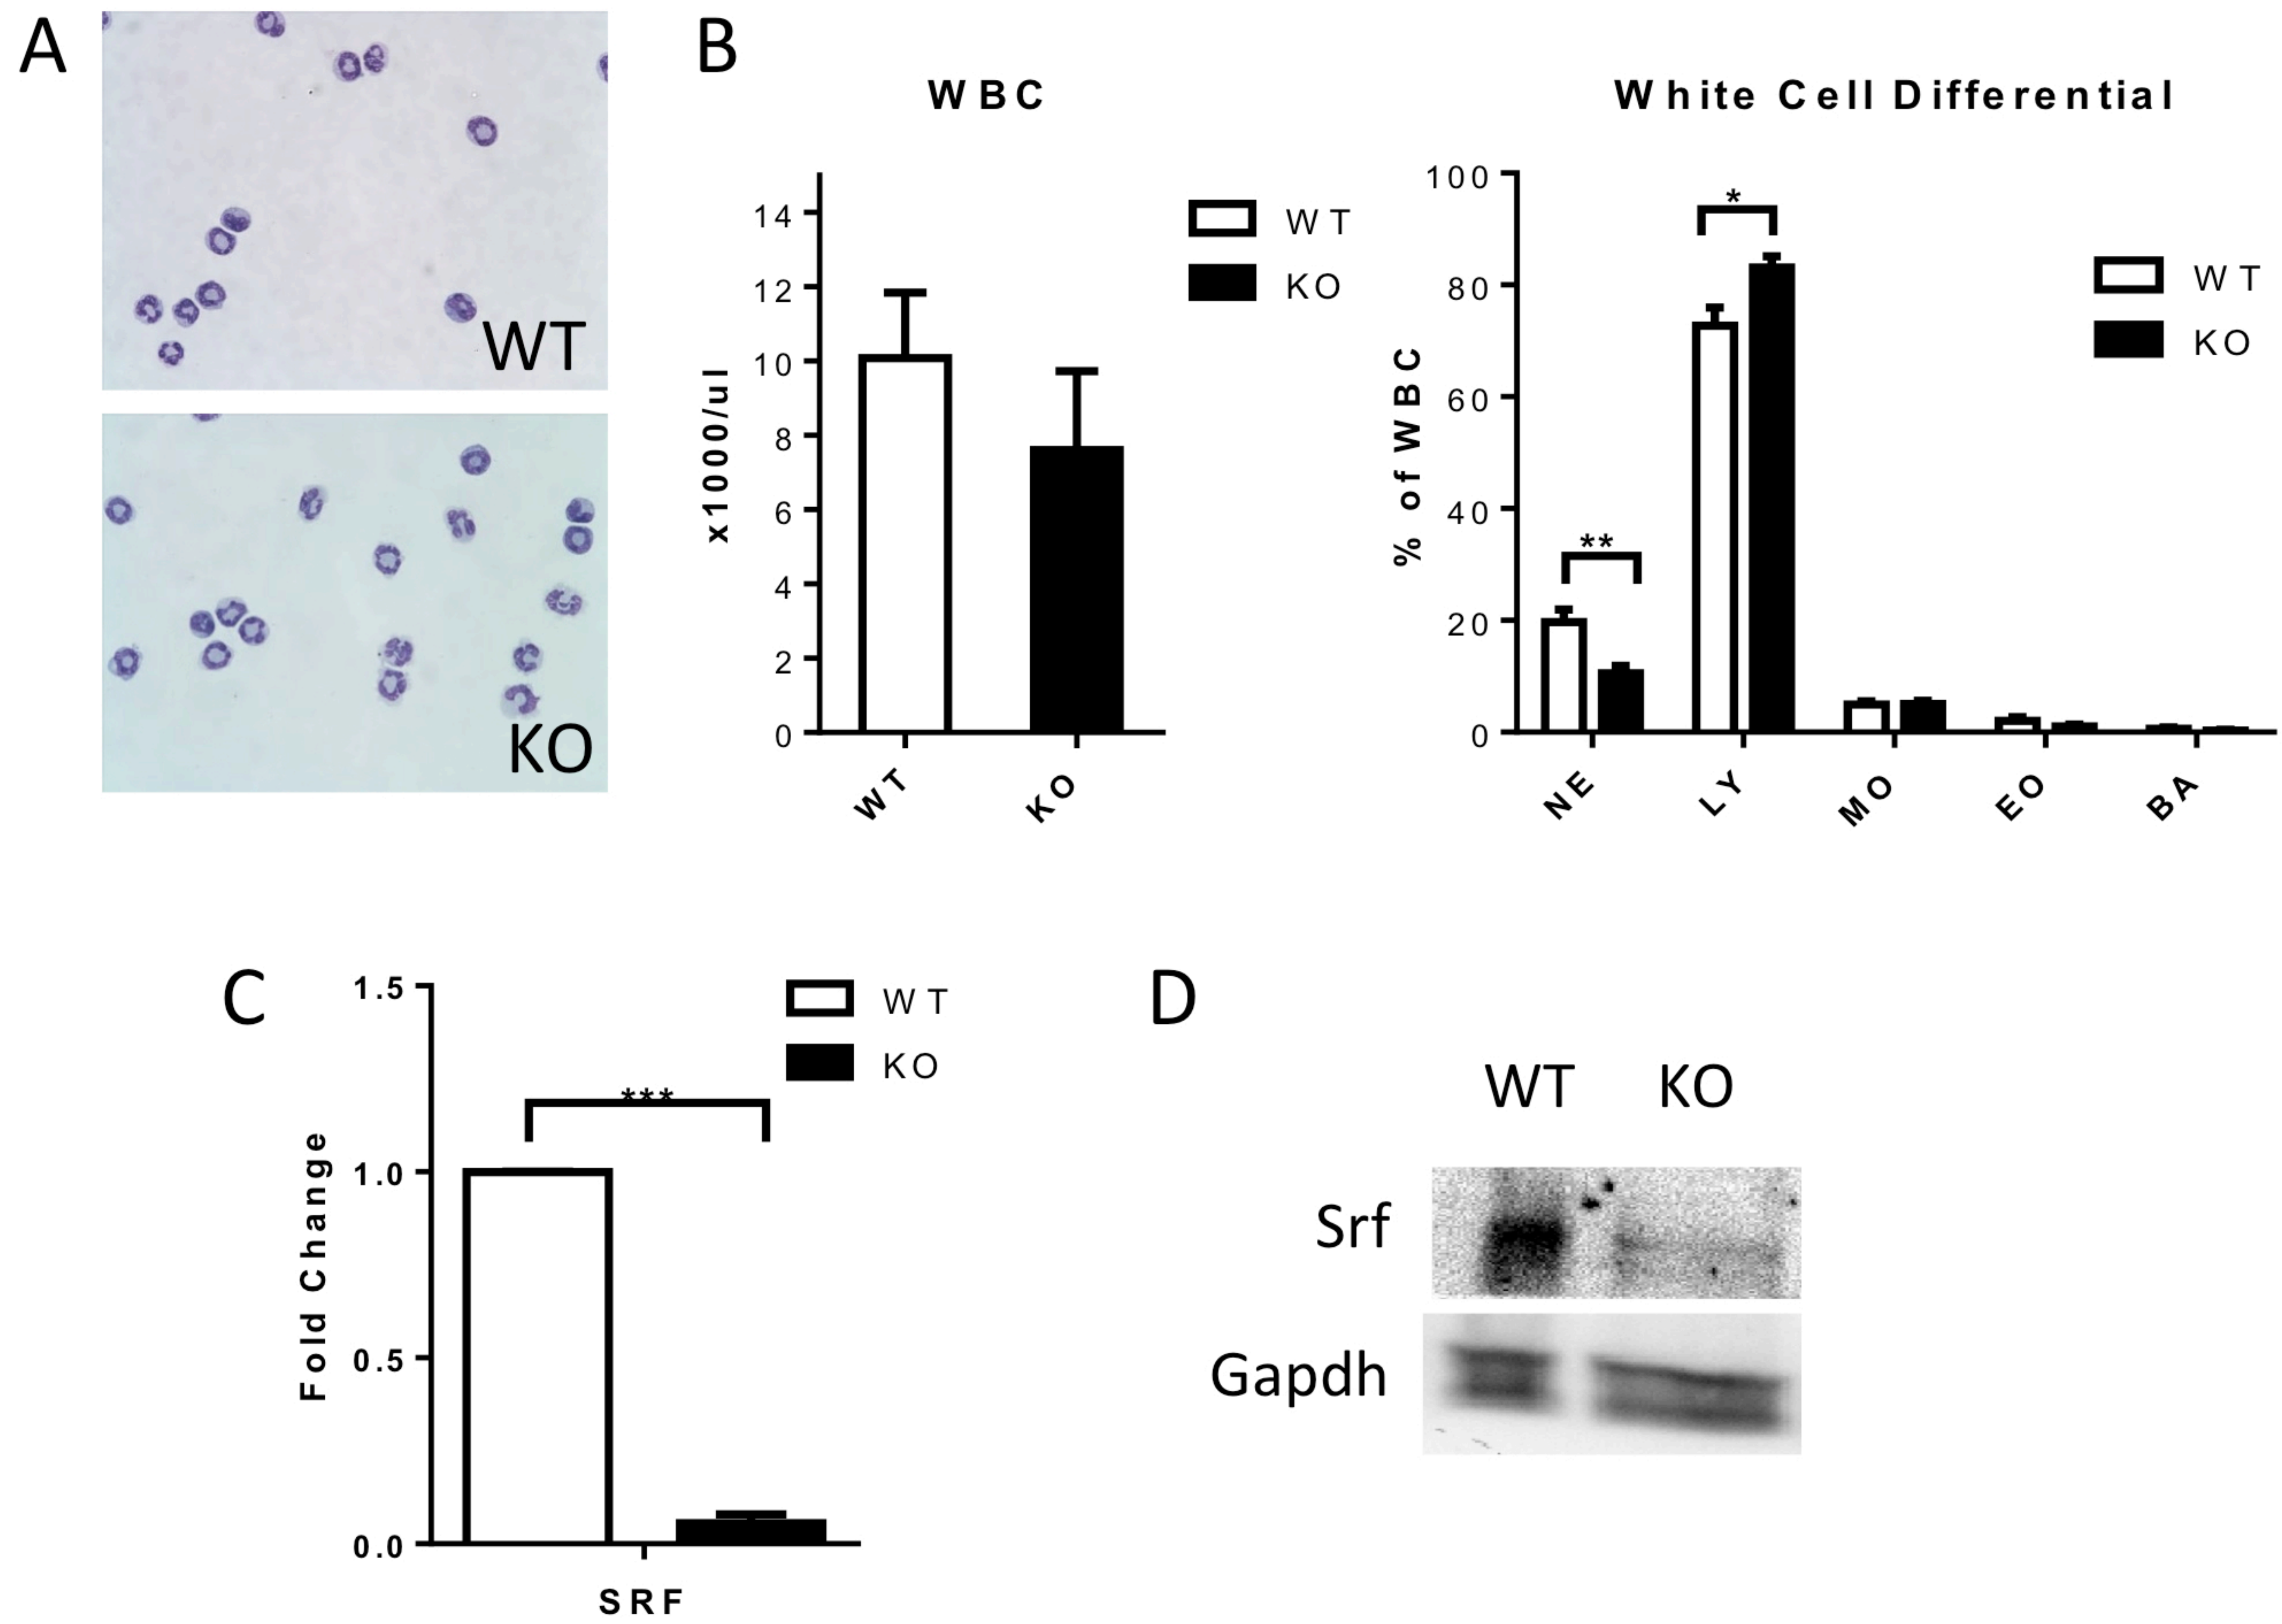

Figure S1



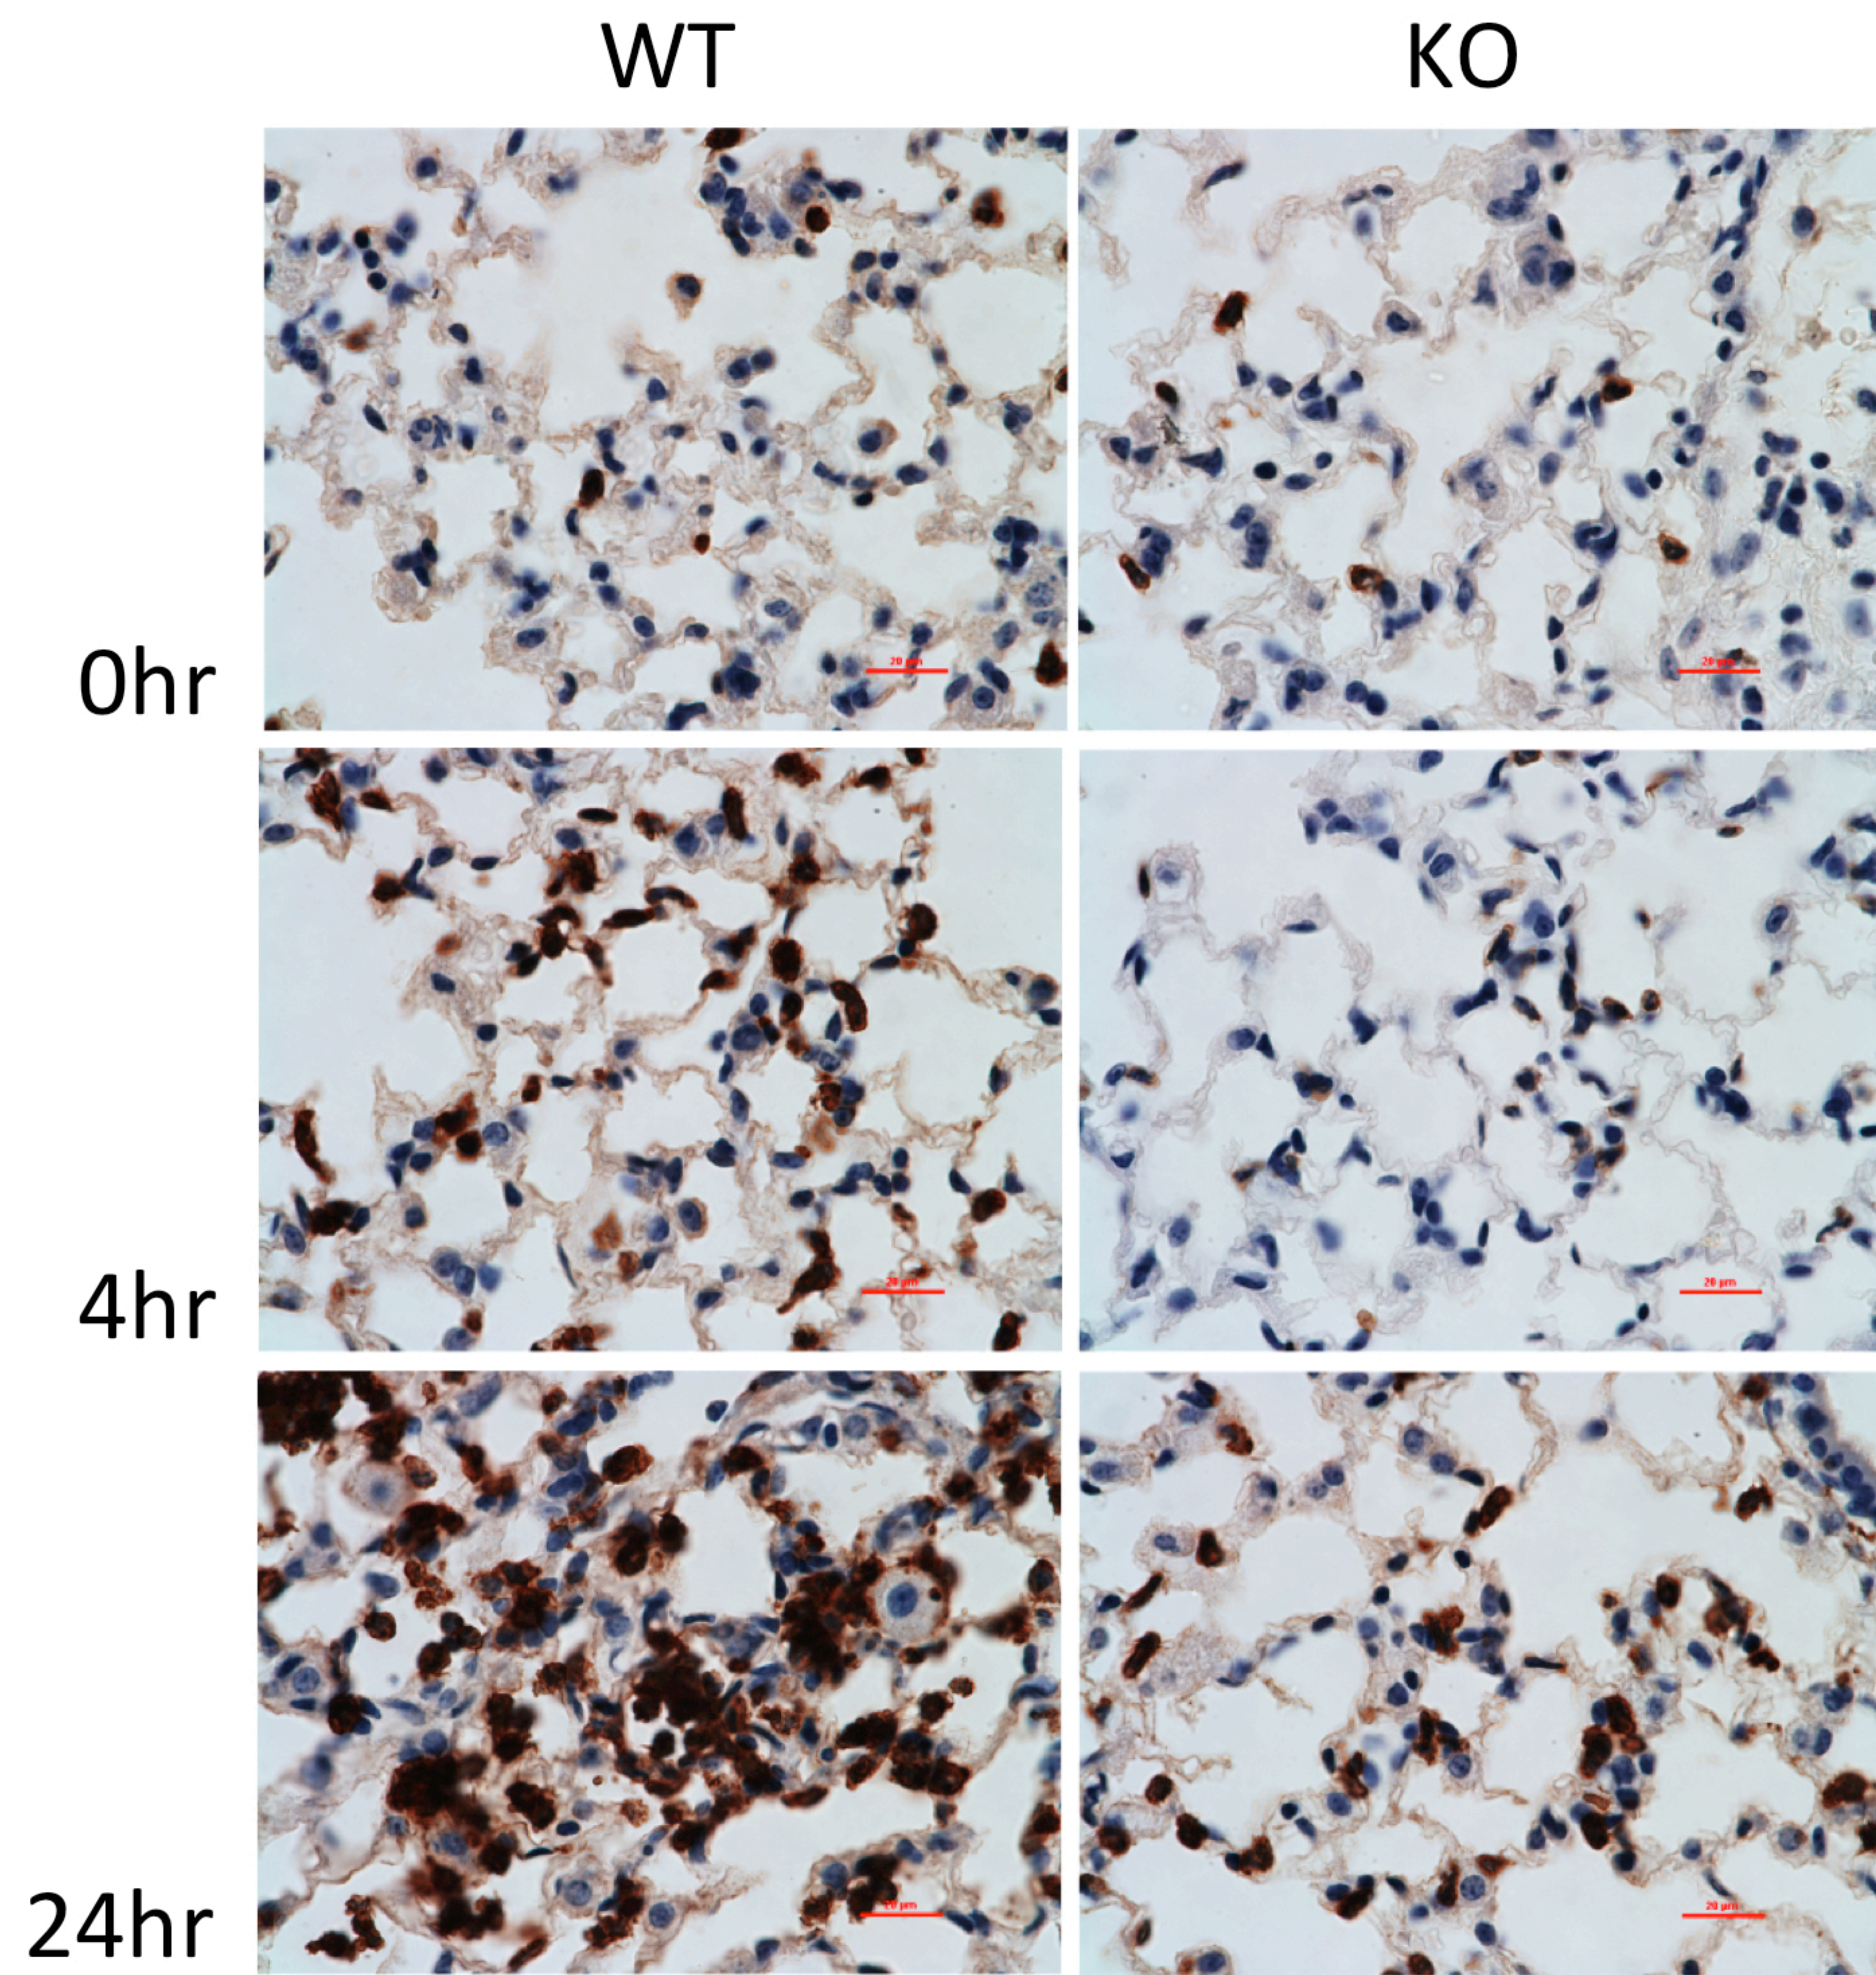

Figure S2



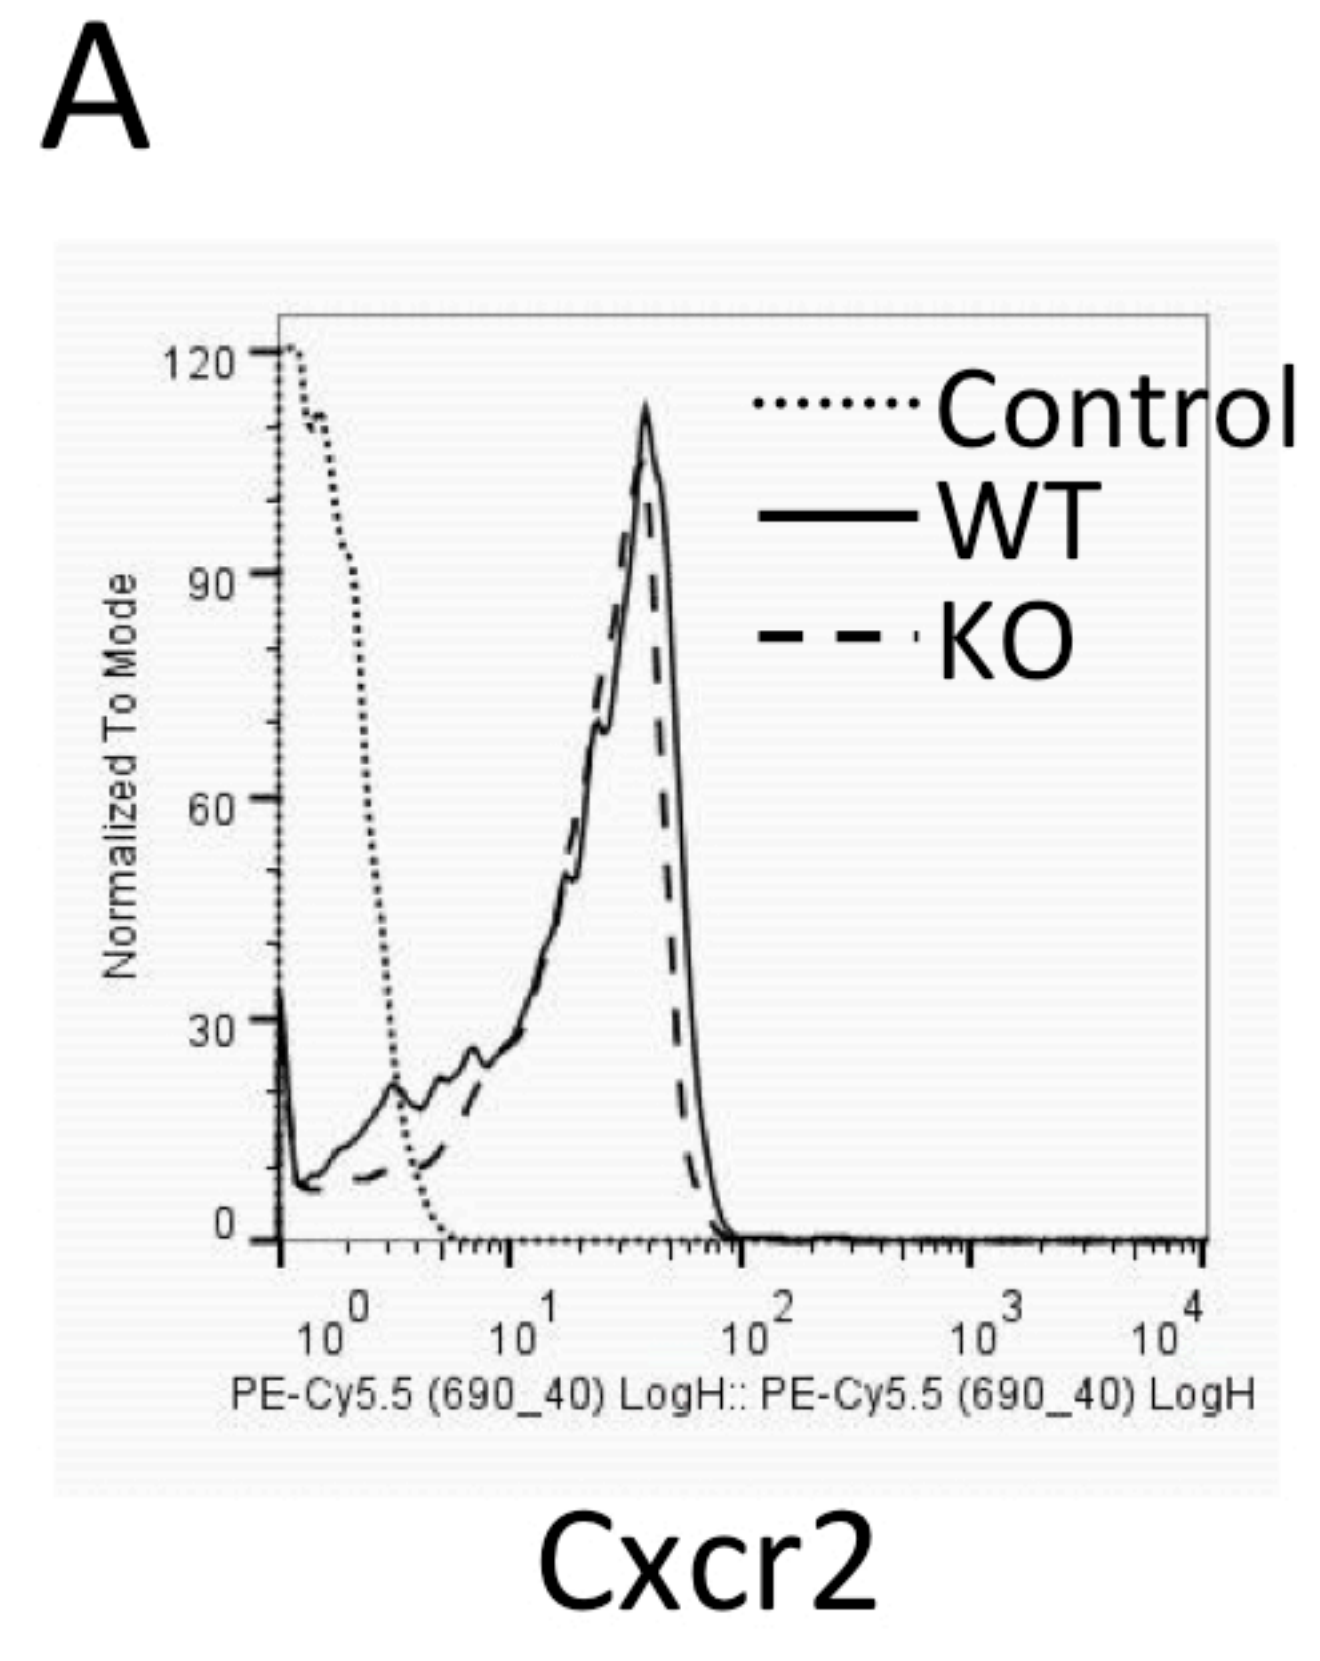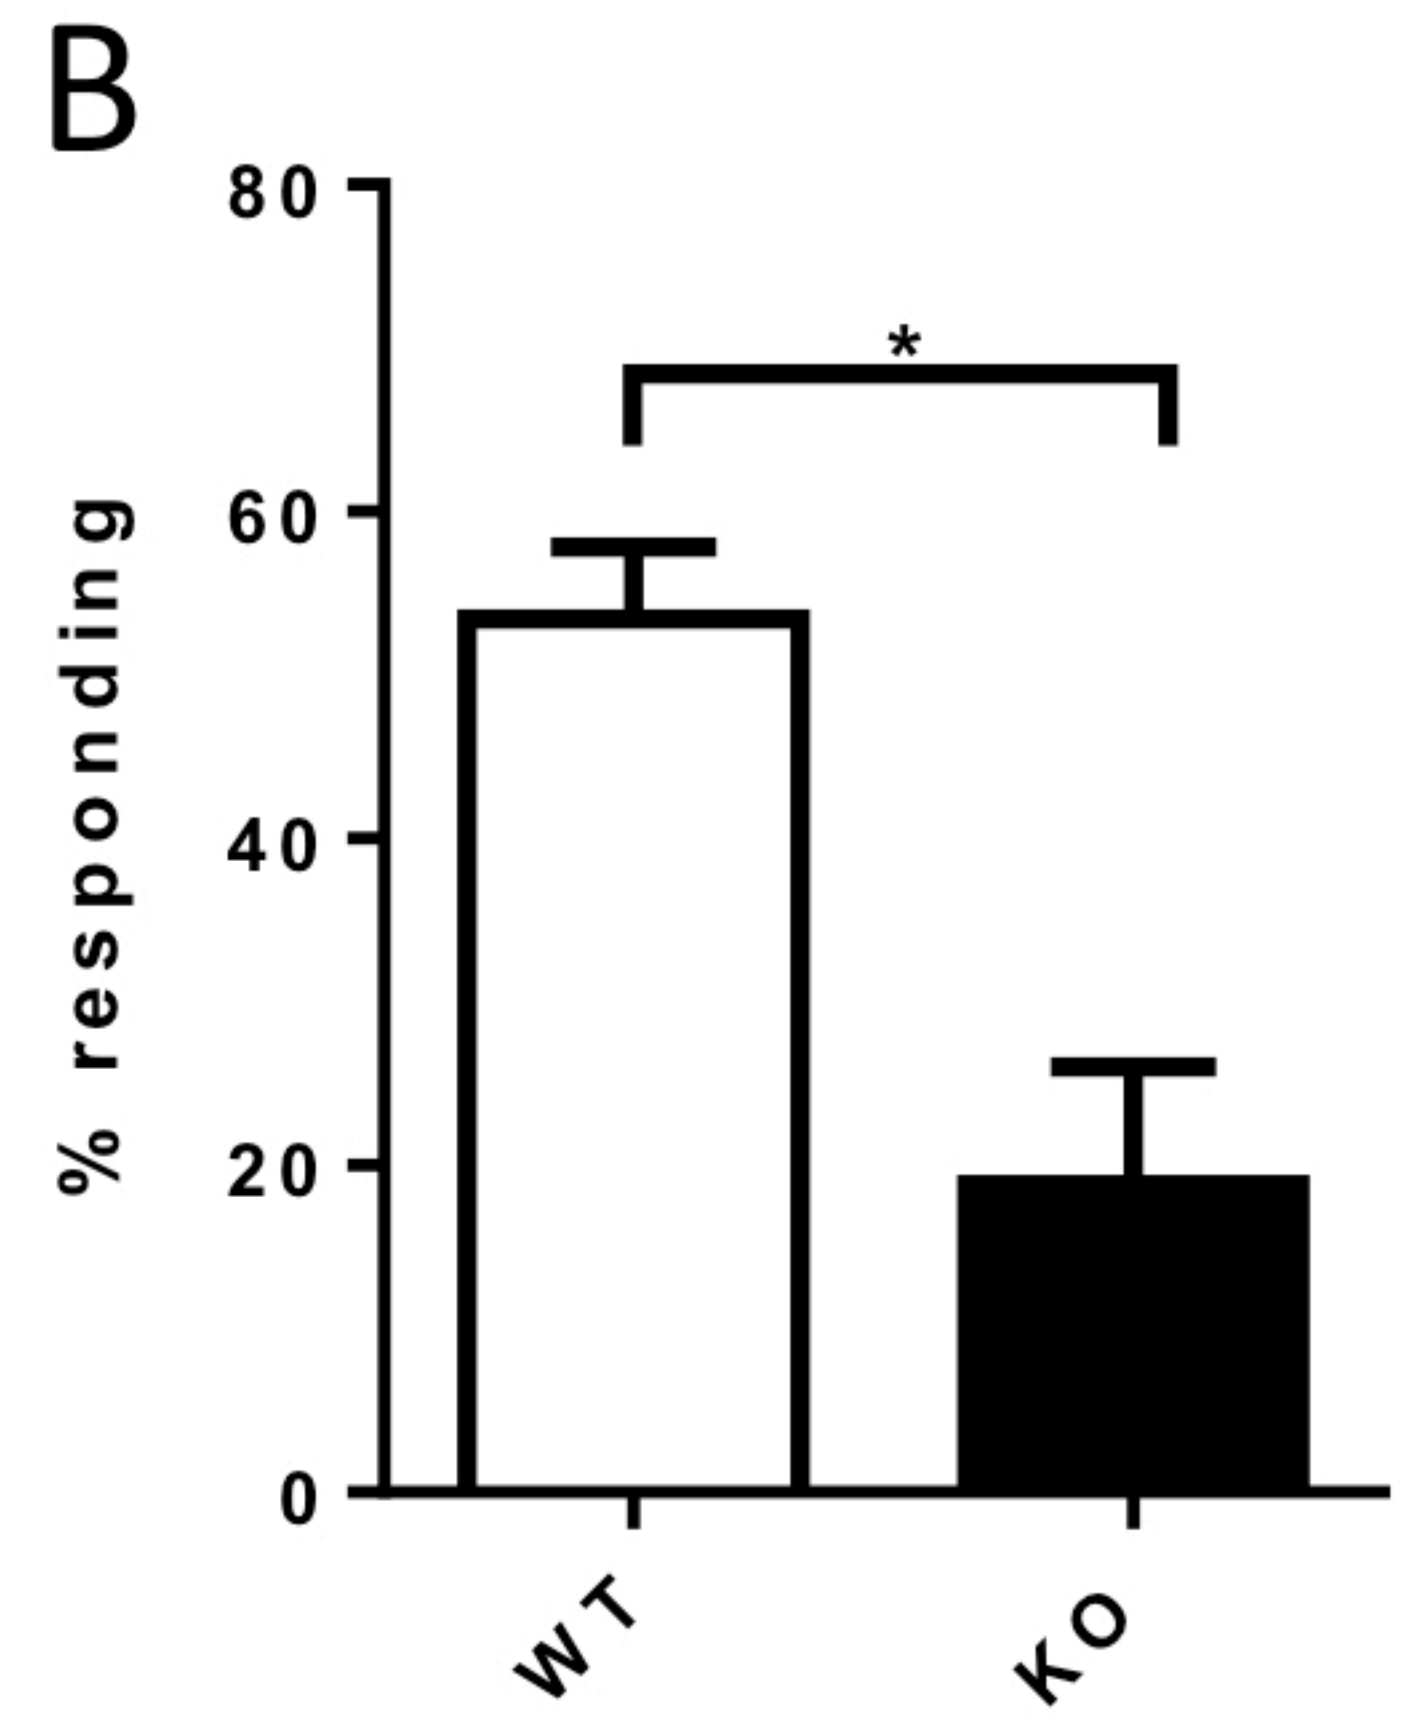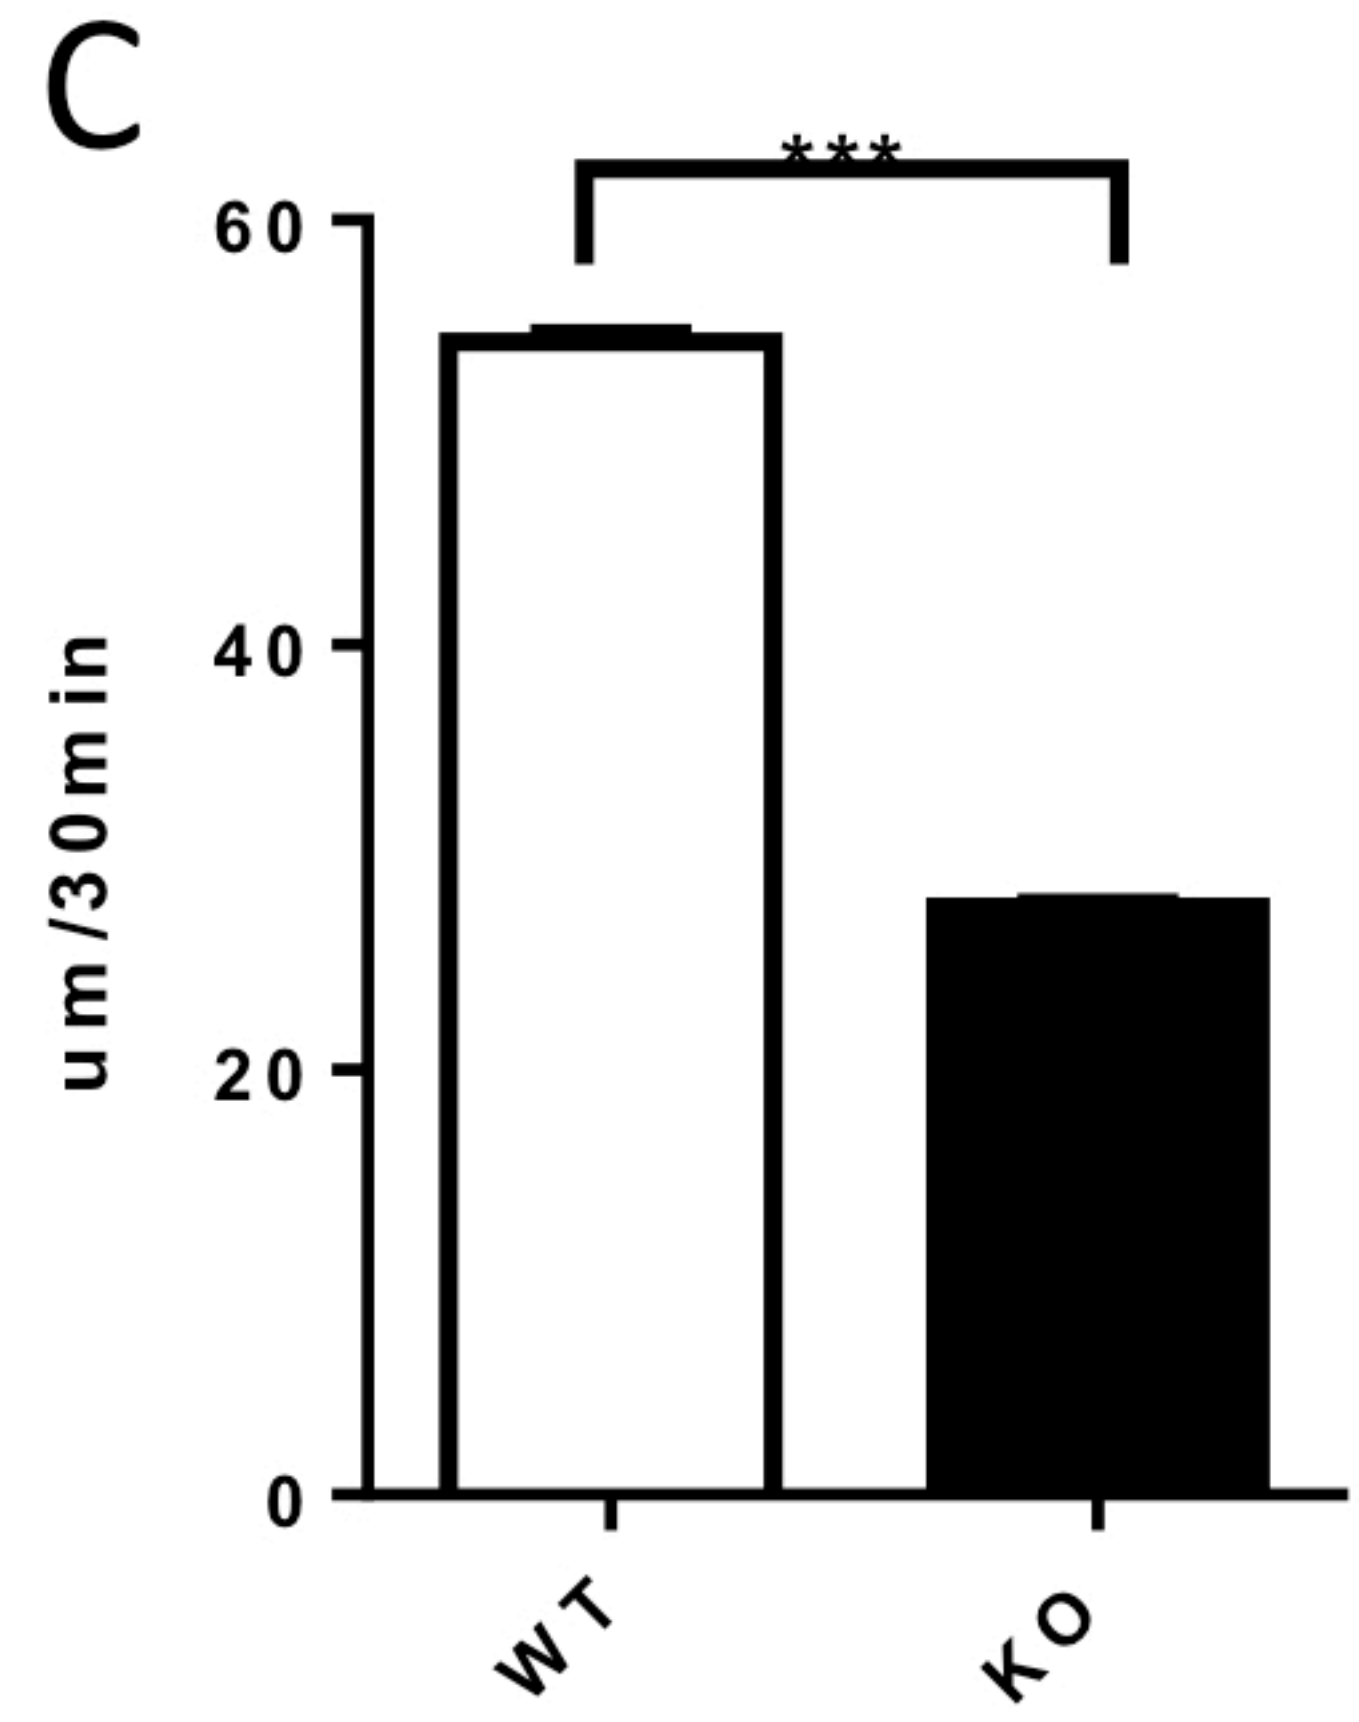

Figure S3

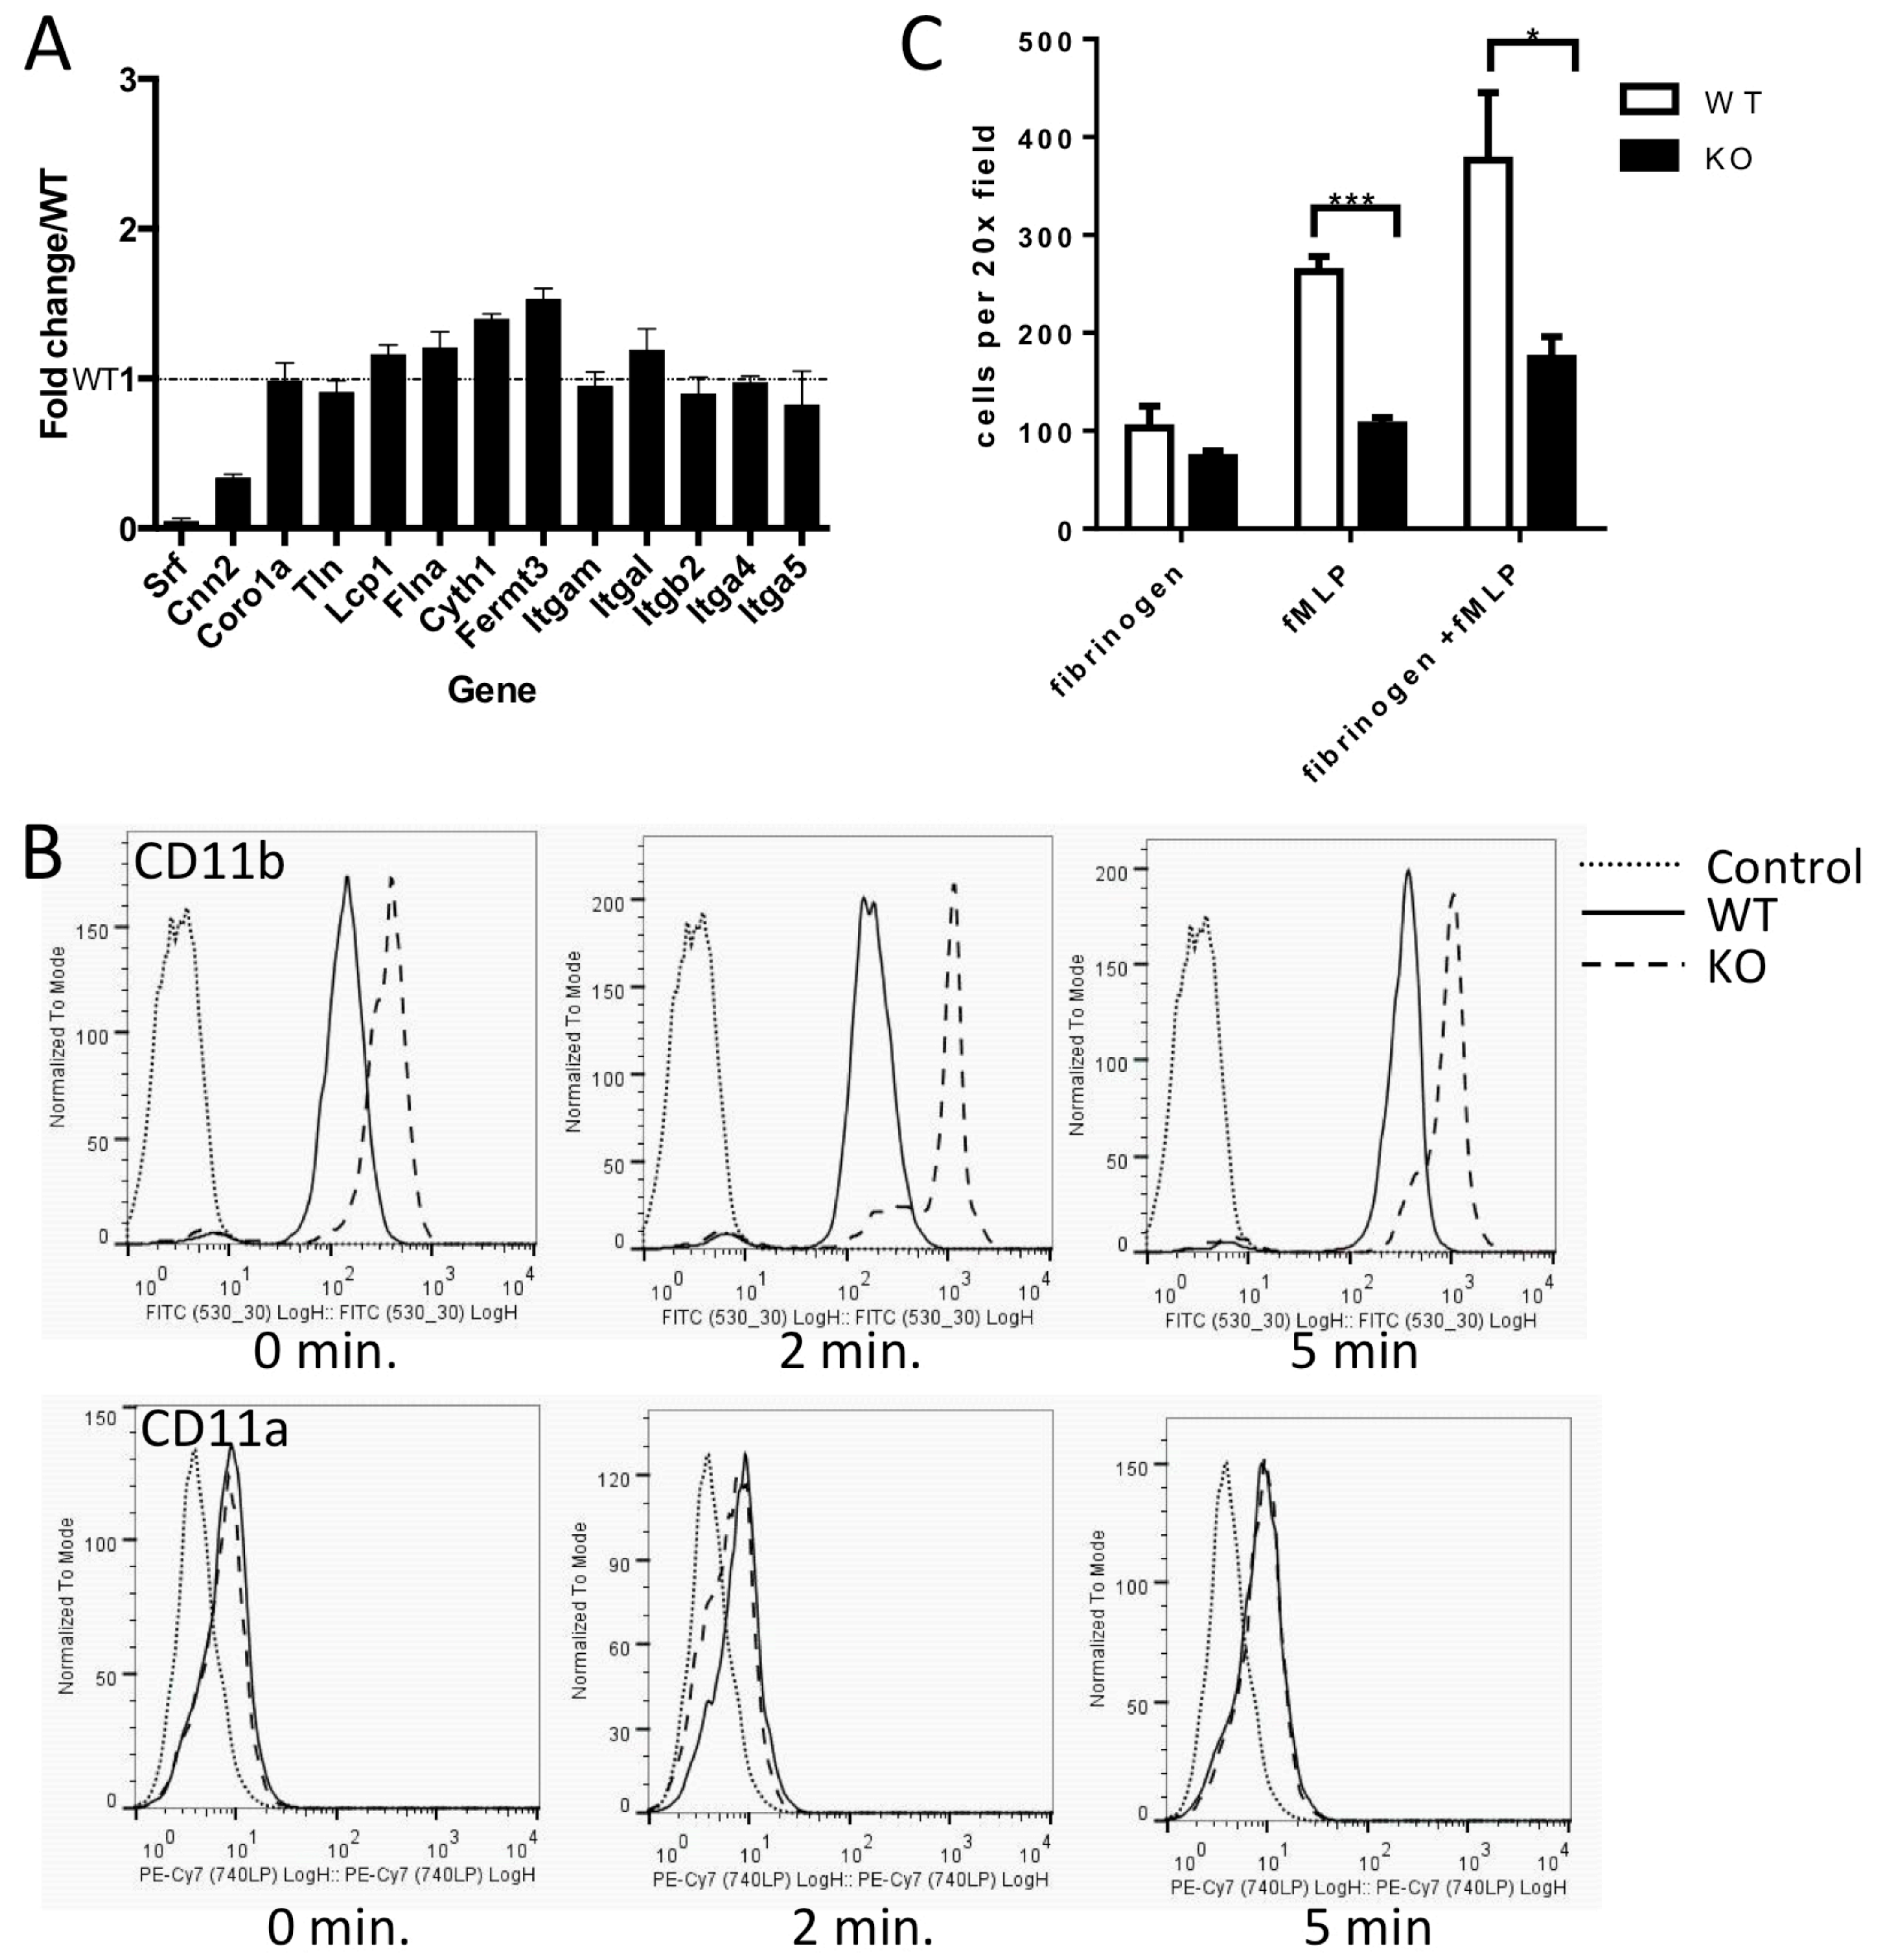

Figure S4



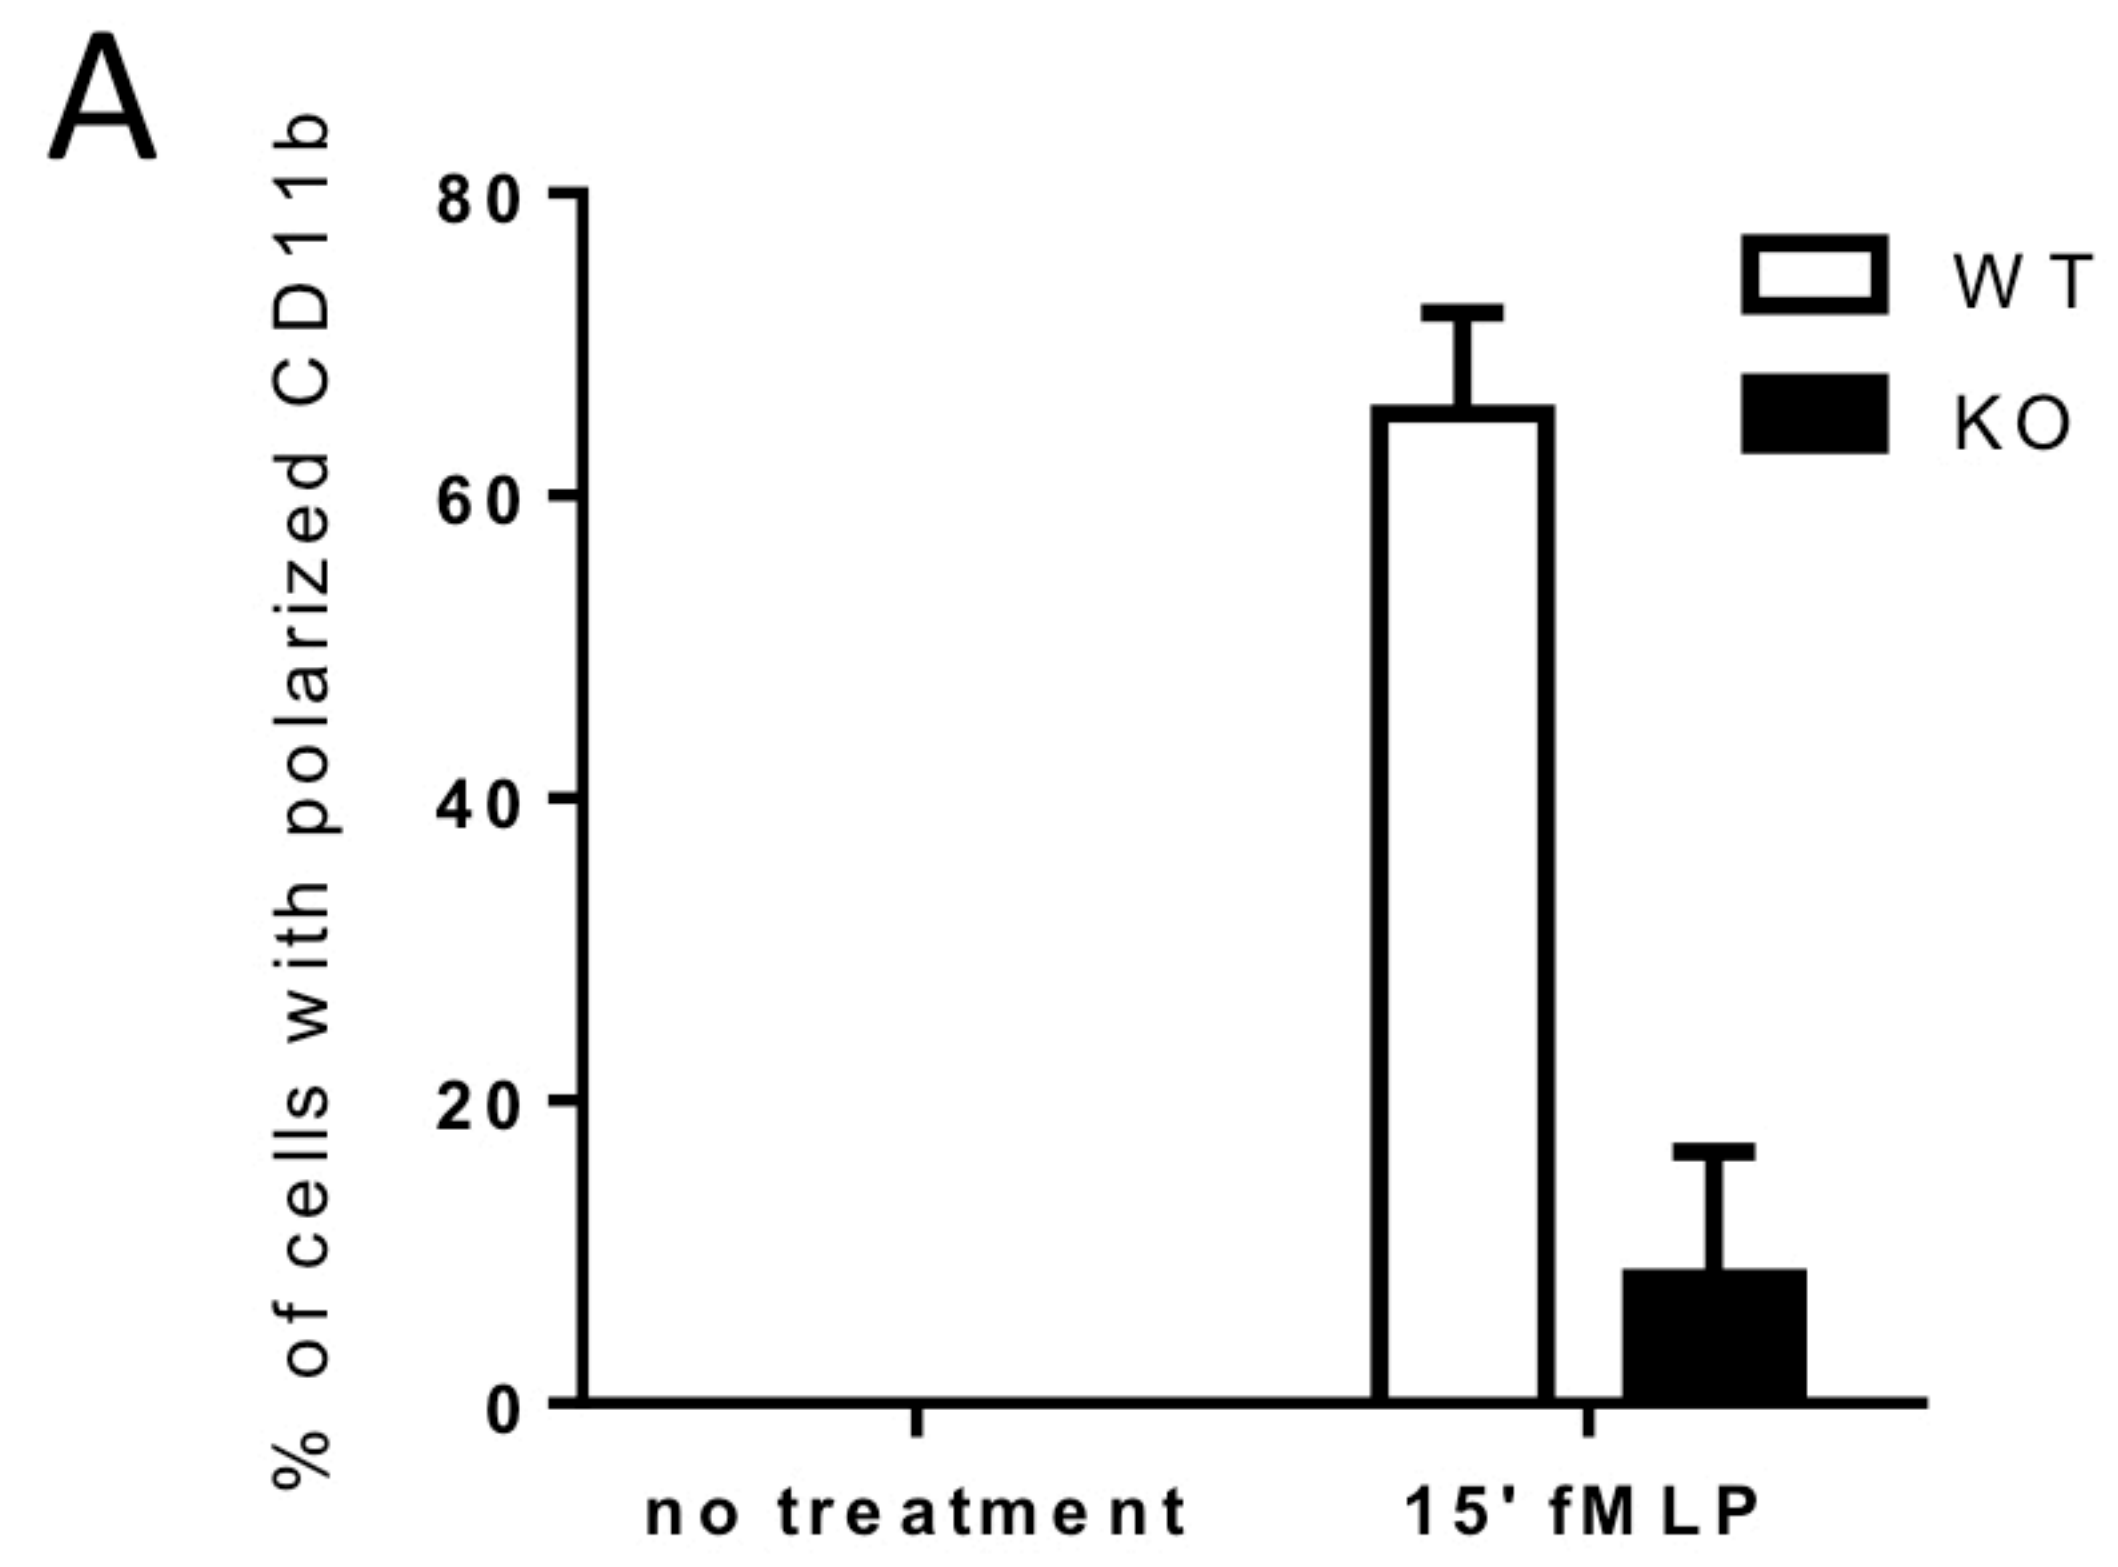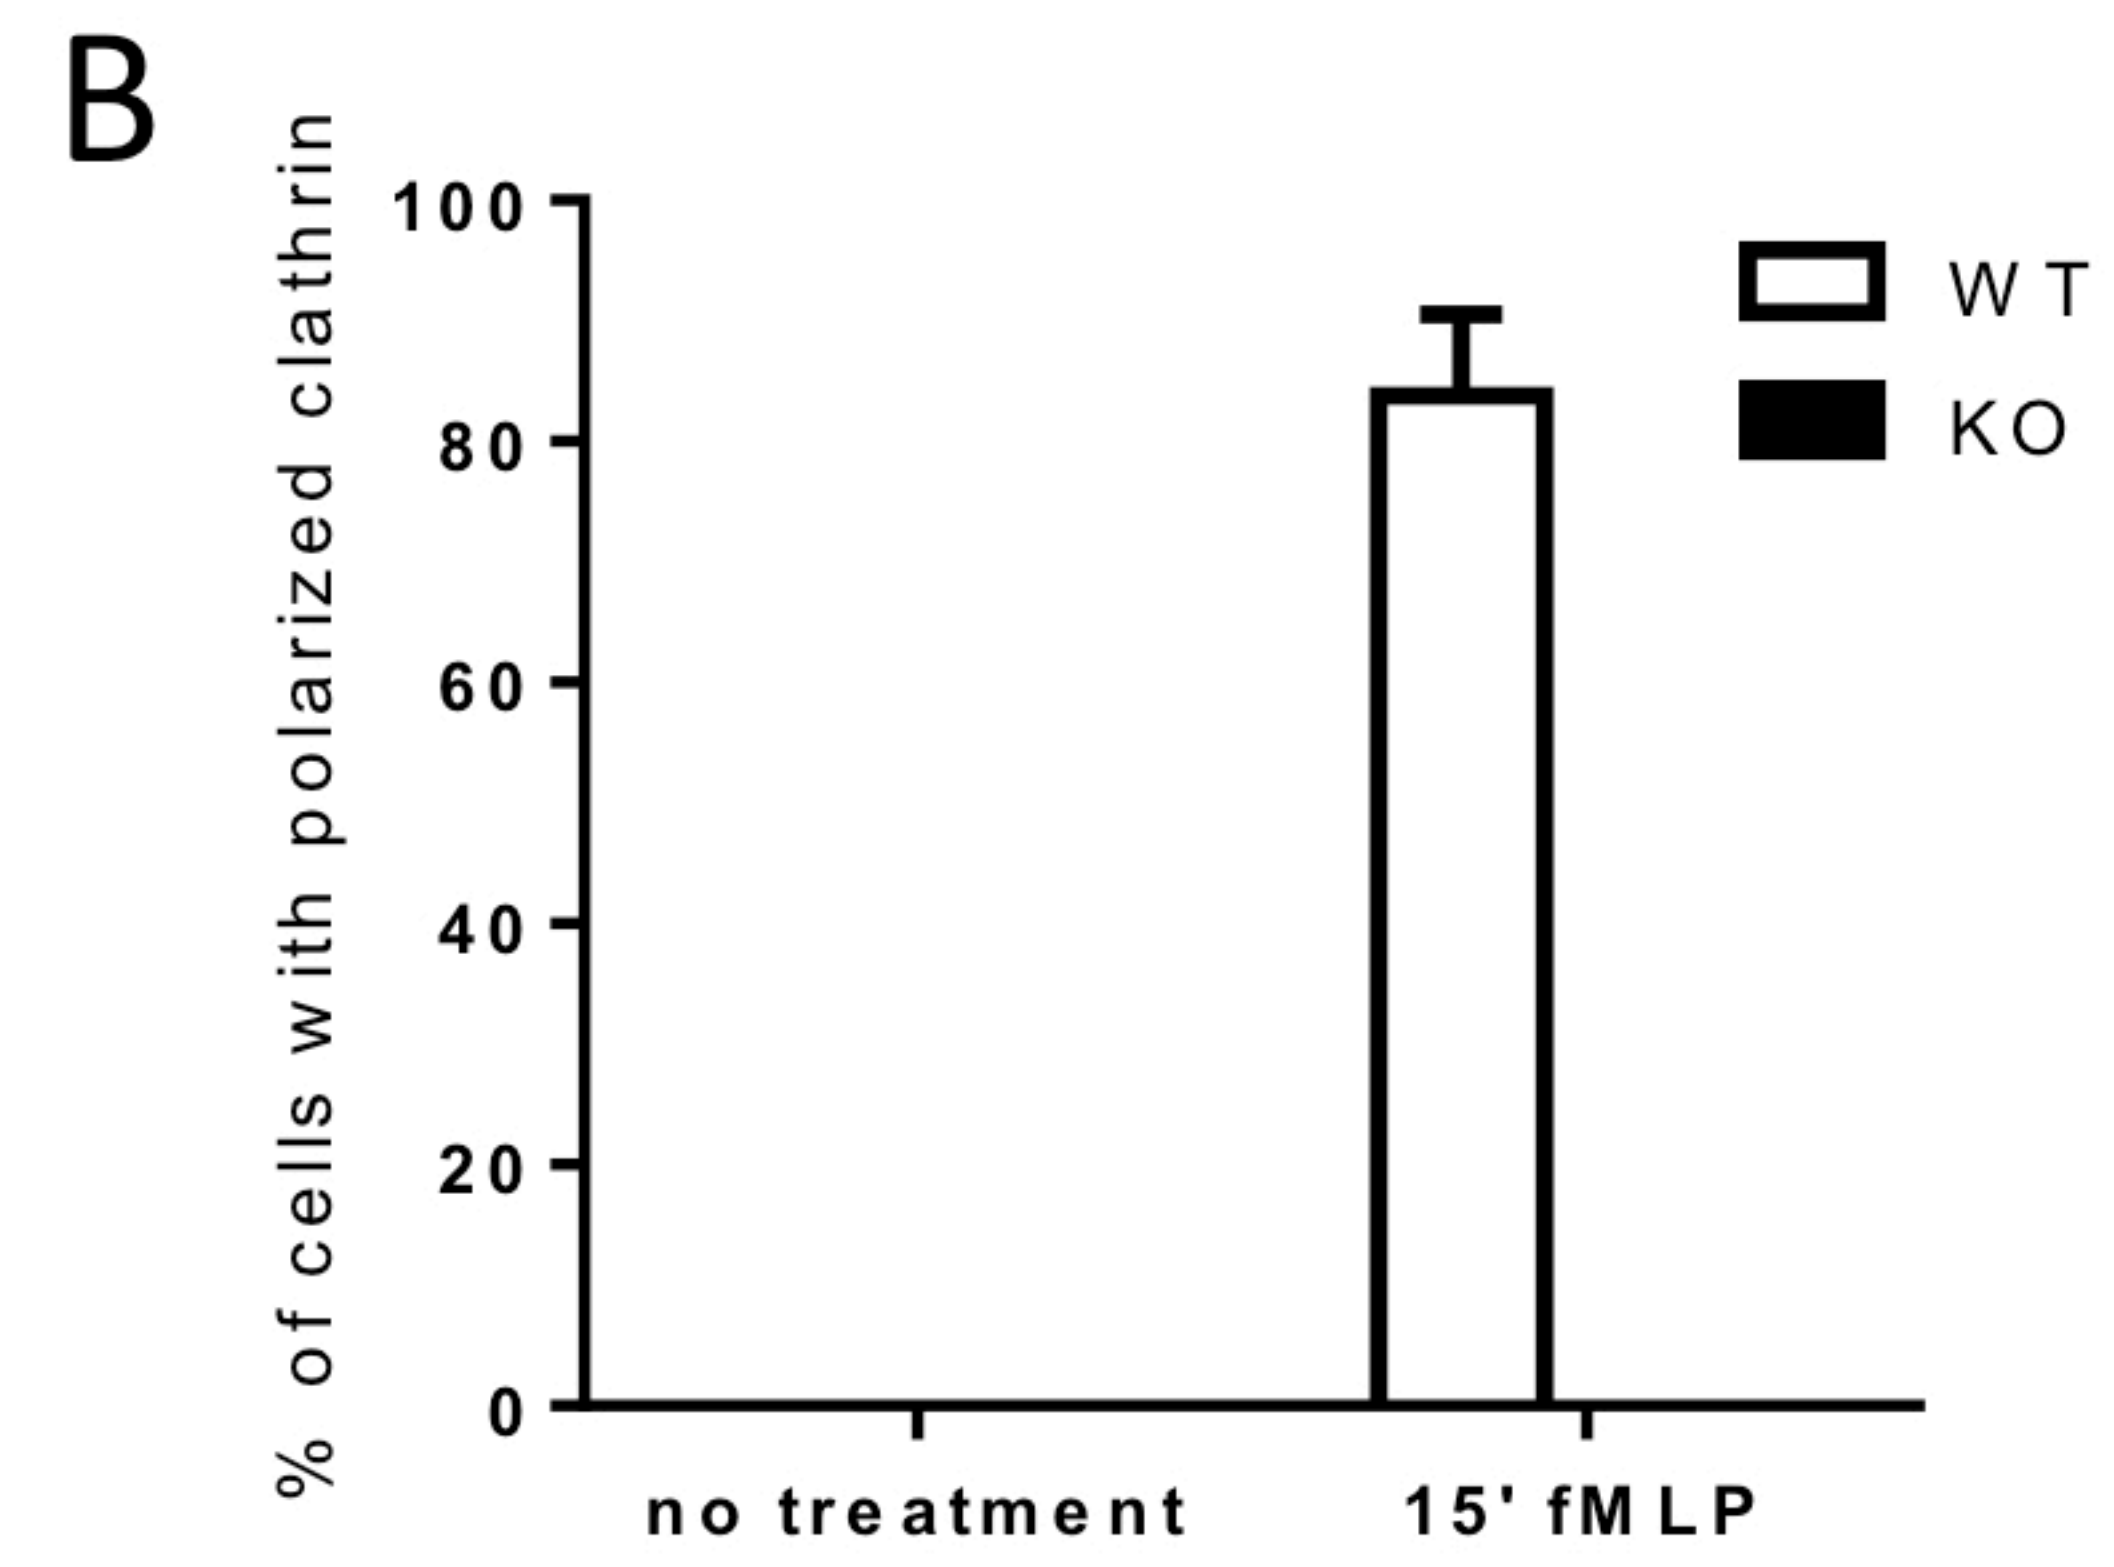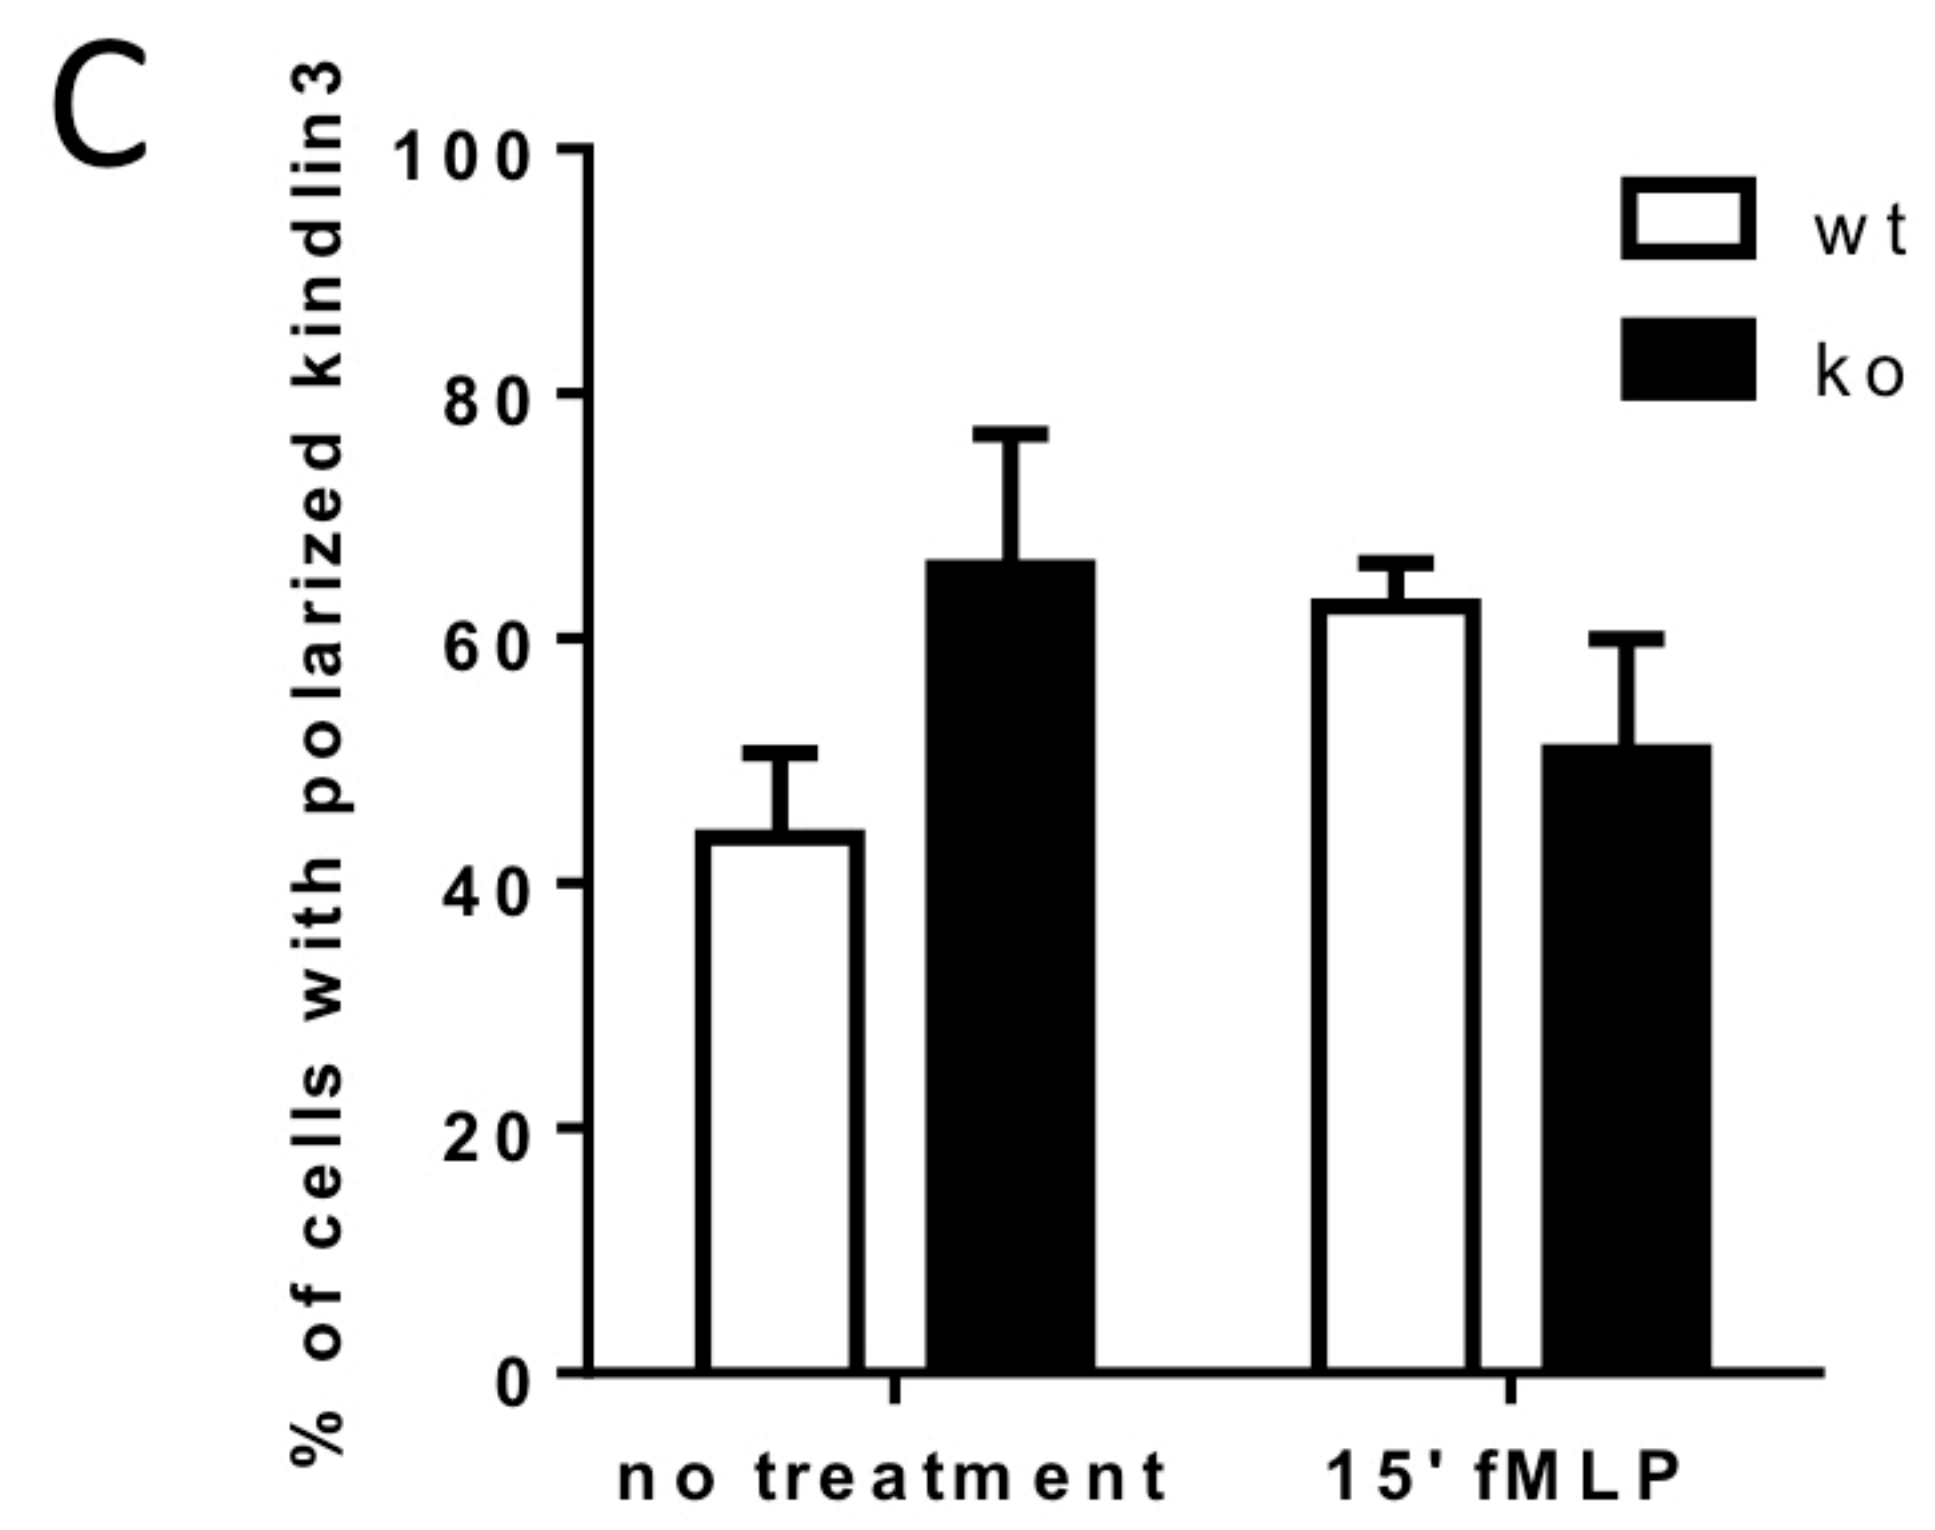

Figure S5
